# Supplementary material for: Insect homolog of oxytocin/vasopressin associated with parenting of males but not females in a subsocial beetle
Source: bioRxiv or medRxiv preprint supplement (doi:10.1101/2022.07.06.499045), 2023-02-08

**Supplementary Figure 2.** Immunohistochemistry of *Nicrophorus* brains. For females and males showing parental care to their larva, a subset of brains was treated with both primary (inotocin) and secondary antibody. Brains processed in the absence of primary antibody showed no background fluorescence due to non-specific binding of the secondary antibody. The ventral side of the brain is shown in all pictures.

Female brain, with primary antibody

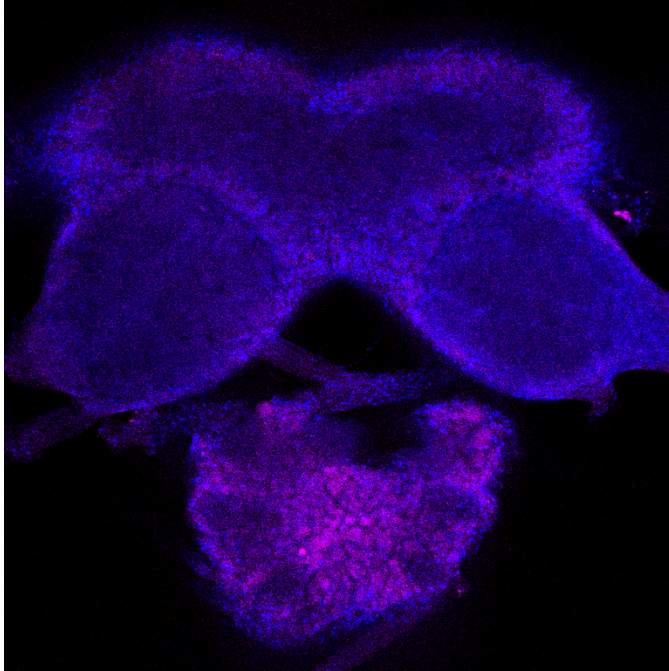

Female brain, no primary antibody

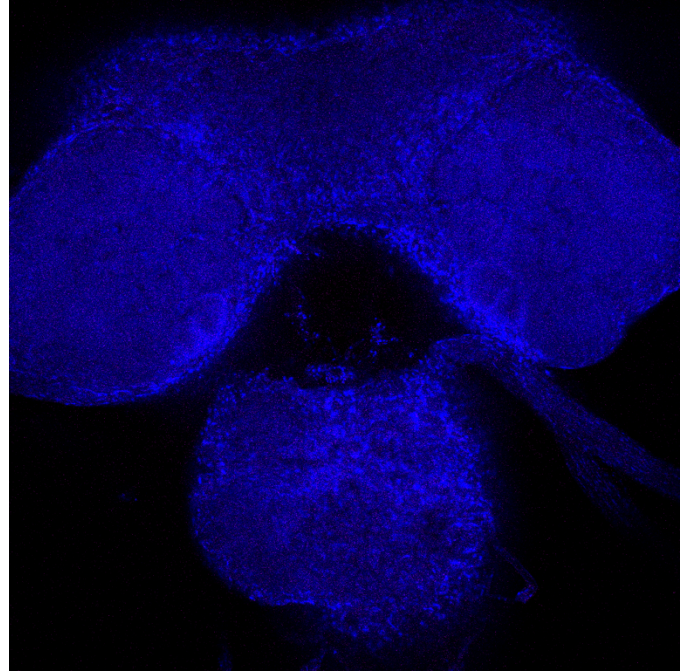

Male brain, with primary antibody

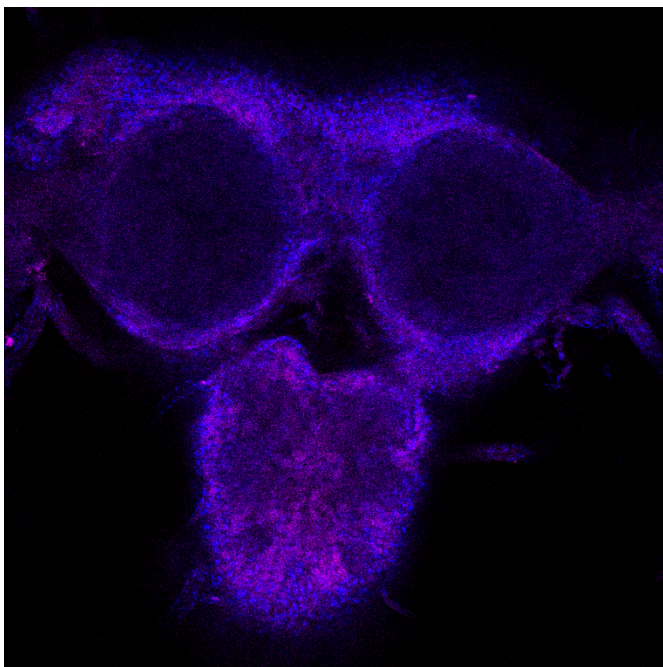

Male brain, no primary antibody

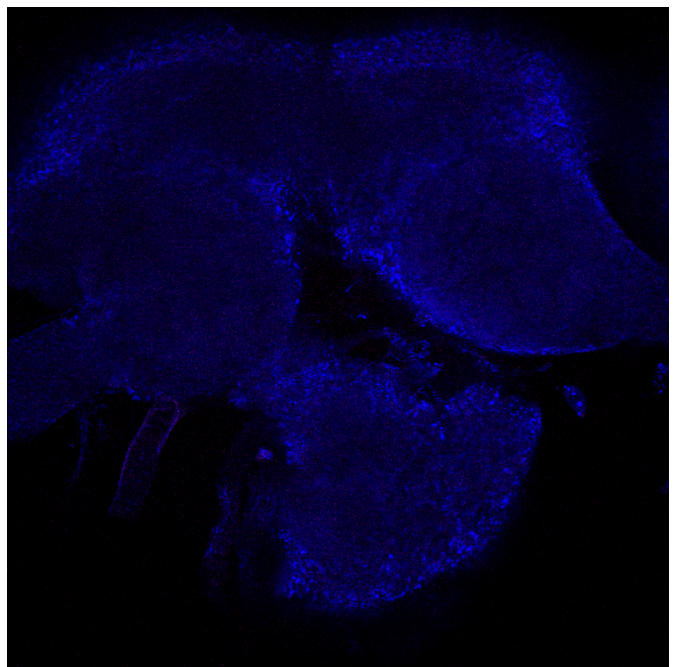

Supplement: Supplementary file [file media-3.pdf]
